# Supplementary material
Source: Research Square preprint supplement (doi:10.21203/rs.3.rs-9171815/v1)
Supplement: Supplementary file 1 [file 2662eb5ec145205d5f82b7d3.pdf]

# Online Resource 1

## Privacy-Preserving LLM Middleware in LIS: Edge-Computing for Coagulation Interpretation Under High-Dimensional Noise

Zihao Zhou

Chongqing Medical University, Chongqing, China

chow@stu.cqmu.edu.cn

### Supplementary Figure

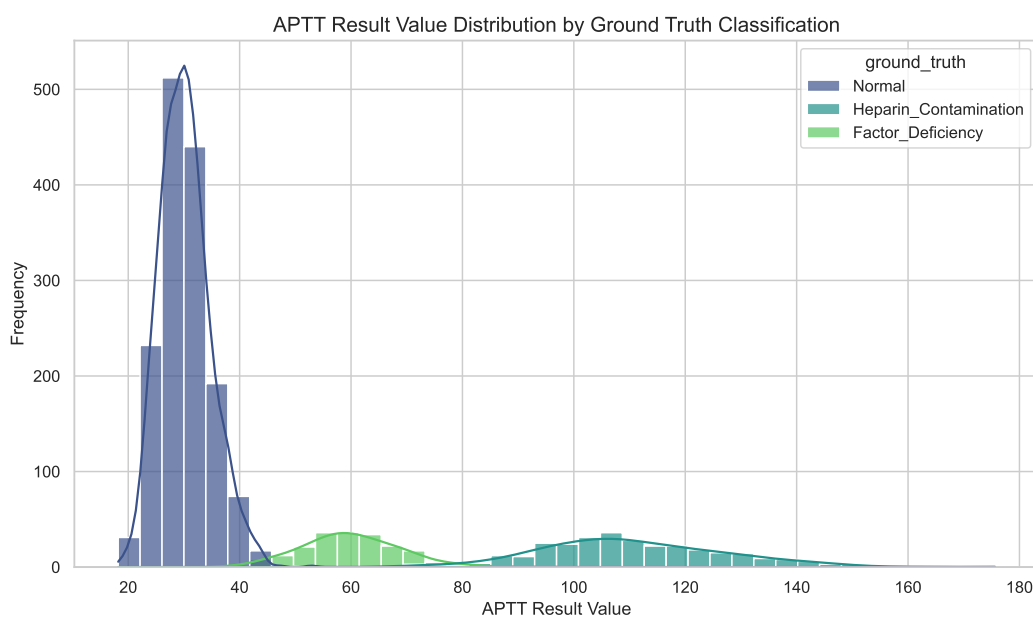

Figure S1: **Fig S1. Raw log-normal distribution of isolated APTT variables.** Detailed histograms displaying the univariate statistical modelling (`scipy.stats`) utilised to anchor the clean baseline data (Group A) prior to textual noise injection. Three categories are shown: Normal ( $\mu = 30.0\text{ s}$ ,  $N = 1,500$ ), Heparin Contamination ( $\mu = 110.0\text{ s}$ ,  $N = 300$ ), and Factor Deficiency ( $\mu = 60.0\text{ s}$ ,  $N = 200$ ). APTT: Activated Partial Thromboplastin Time
